# Supplementary material for: DeepPhospho: Accelerate DIA phosphoproteome profiling by Deep Learning
Source: Research Square preprint supplement (doi:10.21203/rs.3.rs-393214/v1), 2021-04-22
Supplement: Supplementary file 2 [file 2daa12921ef084f3cf3d620c.xlsx]

## Sheet: Overview-MSData
Data name	Used for	Data source	PXD code	Data type	File name	Data authors	Sample source	MS type	Instrument	Process software	Filter criteria	Spec process	RT process
Mouse brain DDA	Model architecture;Pre-training	PRIDE	PXD006637	MaxQuant results	main.zip	Jeffrey J. Liu, et al.	Mouse brain tissues	DDA	QE HF	MaxQuant 1.5.5.2	PTM probability cutoff 0.75	Precursor with max Andromeda score	Median RT
Yeast R2P2 DDA	Model architecture;yPhosPepDB	PRIDE	PXD013453	Thermo raw data	Raw data are listed in sheet "Data source"	Mario Leutert, et al.	S. cerevisiae	DDA	QE;QE plus	MaxQuant 1.6.14.0	PTM probability cutoff 0.75	Precursor with max Andromeda score	Median RT
Human phosphopeptide RT	Pre-training;hPhosPepDB	Supplementary data		Xlsx	HumanPhosphoproteomeDB-41592_2016_BFnmeth3811_MOESM322_ESM.zip	Robert T Lawrence, et al.	Multi human cell lines	DDA	QE series	Comet 2015.01	Ascore cutoff 13		iRT
Vero E6 DIA	Pre-training	PRIDE	PXD019113	Thermo raw data	Raw data are listed in sheet "Data source"	Mehdi Bouhaddou, et al.	African green monkey kidney epithelial Vero E6	DIA	Exploris 480	Spectronaut 14.5	PTM probability cutoff 0.75		iRT
Yeast R2P2 DIA	Pre-training	PRIDE	PXD013453	Thermo raw data	Raw data are listed in sheet "Data source"	Mario Leutert, et al.	S. cerevisiae	DIA	Fusion Lumos	Spectronaut 14.5	PTM probability cutoff 0.75		iRT
RPE1 DIA	Model test;Library evaluation	PRIDE	PXD014525	Thermo raw data	Raw data are listed in sheet "Data source"	Dorte B. Bekker-Jensen, et al.	RPE1	DIA	QE HF-X	Spectronaut 14.5	PTM probability cutoff 0.75		iRT
RPE1 DDA	Model test;DDA library	PRIDE	PXD014525	Spectronaut library	RPE1-phospho-library-15min.kit	Dorte B. Bekker-Jensen, et al.	RPE1	DDA	QE series	MaxQuant;Spectronaut 11.0.15038.19			iRT
U2OS DIA	Model test;Library evaluation	PRIDE	PXD017476	Thermo raw data	Raw data are listed in sheet "Data source"	Shisheng Wang, et al.	U2OS	DIA	Fusion Lumos	Spectronaut 14.5	PTM probability cutoff 0.75		iRT
U2OS DDA	Reference spectra;DDA library	PRIDE	PXD017476	Thermo raw data	Raw data are listed in sheet "Data source"	Shisheng Wang, et al.	U2OS	DDA	Fusion Lumos	Spectronaut 14.5	PTM probability cutoff 0.75		iRT
U-87 DDA	Reference spectra	PRIDE	PXD009227	MaxQuant results	EGF Stimulation_QE HFX_Figure 4_search.rar	Sean J Humphrey, et al.	U-87	DDA	QE HF-X	MaxQuant 1.6.0.9	PTM probability cutoff 0.75	Precursor with max Andromeda score
Two-proteome DIA	Library evaluation	PRIDE	PXD014525	Thermo raw data	Raw data are listed in sheet "Data source"	Dorte B. Bekker-Jensen, et al.	Yeast(BY4742);HeLa	DIA	QE HF-X	Spectronaut 14.5	PTM probability cutoff 0.75		iRT
Two-proteome yeast DDA library	DDA library	PRIDE	PXD014525	Spectronaut library	Yeast-phospho-library-15min.kit	Dorte B. Bekker-Jensen, et al.	Yeast(BY4742)	DDA	QE series	MaxQuant;Spectronaut 13.0.190309			iRT

## Sheet: Overview-ThreeDatabase
Data name	Data source	Original data type	Data authors	Process
hPhosPepDB	Human phosphoproteome database	Phosphopeptide sequence	Robert T Lawrence, et al.	Ascore cutoff 13
hPhosSiteDB	EPSD	Phosphosite	Shaofeng Lin, et al.	Trypsin;Pep len 7-30;no miss cleavage;max phosphosite number 1
yPhosPepDB	Yeast phosphoproteomics raw data	Phosphopeptide sequence	Mario Leutert, et al.	PTM probability cutoff 0.75

## Sheet: Data source
Data name	PXD code	Authors	MS type	Sample source	Instrument	Raw data file name	FTP url
Yeast R2P2 DDA	PXD013453	Mario Leutert, et al.	DDA	S. cerevisiae	QE plus	UWPRQE0259_ML019_IMAC_sp3_2Murea_1.raw	ftp://ftp.pride.ebi.ac.uk/pride/data/archive/2019/12/PXD013453
Yeast R2P2 DDA	PXD013453	Mario Leutert, et al.	DDA	S. cerevisiae	QE plus	UWPRQE0273_ML019_IMAC_sp3_2Murea_2.raw	ftp://ftp.pride.ebi.ac.uk/pride/data/archive/2019/12/PXD013453
Yeast R2P2 DDA	PXD013453	Mario Leutert, et al.	DDA	S. cerevisiae	QE plus	UWPRQE0280_ML019_IMAC_sp3_2Murea_3.raw	ftp://ftp.pride.ebi.ac.uk/pride/data/archive/2019/12/PXD013453
Yeast R2P2 DDA	PXD013453	Mario Leutert, et al.	DDA	S. cerevisiae	QE plus	UWPRQE0263_ML019_IMAC_sp3_80EtOH_1.raw	ftp://ftp.pride.ebi.ac.uk/pride/data/archive/2019/12/PXD013453
Yeast R2P2 DDA	PXD013453	Mario Leutert, et al.	DDA	S. cerevisiae	QE plus	UWPRQE0275_ML019_IMAC_sp3_80EtOH_2.raw	ftp://ftp.pride.ebi.ac.uk/pride/data/archive/2019/12/PXD013453
Yeast R2P2 DDA	PXD013453	Mario Leutert, et al.	DDA	S. cerevisiae	QE plus	UWPRQE0284_ML019_IMAC_sp3_80EtOH_3.raw	ftp://ftp.pride.ebi.ac.uk/pride/data/archive/2019/12/PXD013453
Yeast R2P2 DDA	PXD013453	Mario Leutert, et al.	DDA	S. cerevisiae	QE plus	UWPRQE0264_ML019_IMAC_sp3_DNA_1.raw	ftp://ftp.pride.ebi.ac.uk/pride/data/archive/2019/12/PXD013453
Yeast R2P2 DDA	PXD013453	Mario Leutert, et al.	DDA	S. cerevisiae	QE plus	UWPRQE0270_ML019_IMAC_sp3_DNA_2.raw	ftp://ftp.pride.ebi.ac.uk/pride/data/archive/2019/12/PXD013453
Yeast R2P2 DDA	PXD013453	Mario Leutert, et al.	DDA	S. cerevisiae	QE plus	UWPRQE0279_ML019_IMAC_sp3_DNA_3.raw	ftp://ftp.pride.ebi.ac.uk/pride/data/archive/2019/12/PXD013453
Yeast R2P2 DDA	PXD013453	Mario Leutert, et al.	DDA	S. cerevisiae	QE plus	UWPRQE0258_ML019_IMAC_sp3_np40_1.raw	ftp://ftp.pride.ebi.ac.uk/pride/data/archive/2019/12/PXD013453
Yeast R2P2 DDA	PXD013453	Mario Leutert, et al.	DDA	S. cerevisiae	QE plus	UWPRQE0276_ML019_IMAC_sp3_np40_2.raw	ftp://ftp.pride.ebi.ac.uk/pride/data/archive/2019/12/PXD013453
Yeast R2P2 DDA	PXD013453	Mario Leutert, et al.	DDA	S. cerevisiae	QE plus	UWPRQE0286_ML019_IMAC_sp3_np40_3.raw	ftp://ftp.pride.ebi.ac.uk/pride/data/archive/2019/12/PXD013453
Yeast R2P2 DDA	PXD013453	Mario Leutert, et al.	DDA	S. cerevisiae	QE plus	UWPRQE0255_ML019_IMAC_sp3_phosphi_1.raw	ftp://ftp.pride.ebi.ac.uk/pride/data/archive/2019/12/PXD013453
Yeast R2P2 DDA	PXD013453	Mario Leutert, et al.	DDA	S. cerevisiae	QE plus	UWPRQE0267_ML019_IMAC_sp3_phosphi_2.raw	ftp://ftp.pride.ebi.ac.uk/pride/data/archive/2019/12/PXD013453
Yeast R2P2 DDA	PXD013453	Mario Leutert, et al.	DDA	S. cerevisiae	QE plus	UWPRQE0282_ML019_IMAC_sp3_phosphi_3.raw	ftp://ftp.pride.ebi.ac.uk/pride/data/archive/2019/12/PXD013453
Yeast R2P2 DDA	PXD013453	Mario Leutert, et al.	DDA	S. cerevisiae	QE plus	UWPRQE0345_ML019_IMAC_sp3_proti_4.raw	ftp://ftp.pride.ebi.ac.uk/pride/data/archive/2019/12/PXD013453
Yeast R2P2 DDA	PXD013453	Mario Leutert, et al.	DDA	S. cerevisiae	QE plus	UWPRQE0346_ML019_IMAC_sp3_proti_5.raw	ftp://ftp.pride.ebi.ac.uk/pride/data/archive/2019/12/PXD013453
Yeast R2P2 DDA	PXD013453	Mario Leutert, et al.	DDA	S. cerevisiae	QE plus	UWPRQE0347_ML019_IMAC_sp3_proti_6.raw	ftp://ftp.pride.ebi.ac.uk/pride/data/archive/2019/12/PXD013453
Yeast R2P2 DDA	PXD013453	Mario Leutert, et al.	DDA	S. cerevisiae	QE plus	UWPRQE0348_ML019_IMAC_sp3_proti10_1.raw	ftp://ftp.pride.ebi.ac.uk/pride/data/archive/2019/12/PXD013453
Yeast R2P2 DDA	PXD013453	Mario Leutert, et al.	DDA	S. cerevisiae	QE plus	UWPRQE0349_ML019_IMAC_sp3_proti10_2.raw	ftp://ftp.pride.ebi.ac.uk/pride/data/archive/2019/12/PXD013453
Yeast R2P2 DDA	PXD013453	Mario Leutert, et al.	DDA	S. cerevisiae	QE plus	UWPRQE0350_ML019_IMAC_sp3_proti10_3.raw	ftp://ftp.pride.ebi.ac.uk/pride/data/archive/2019/12/PXD013453
Yeast R2P2 DDA	PXD013453	Mario Leutert, et al.	DDA	S. cerevisiae	QE plus	UWPRQE0256_ML019_IMAC_sp3_sds_1.raw	ftp://ftp.pride.ebi.ac.uk/pride/data/archive/2019/12/PXD013453
Yeast R2P2 DDA	PXD013453	Mario Leutert, et al.	DDA	S. cerevisiae	QE plus	UWPRQE0268_ML019_IMAC_sp3_sds_2.raw	ftp://ftp.pride.ebi.ac.uk/pride/data/archive/2019/12/PXD013453
Yeast R2P2 DDA	PXD013453	Mario Leutert, et al.	DDA	S. cerevisiae	QE plus	UWPRQE0288_ML019_IMAC_sp3_sds_3.raw	ftp://ftp.pride.ebi.ac.uk/pride/data/archive/2019/12/PXD013453
Yeast R2P2 DDA	PXD013453	Mario Leutert, et al.	DDA	S. cerevisiae	QE plus	UWPRQE0257_ML019_IMAC_sp3_triton_1.raw	ftp://ftp.pride.ebi.ac.uk/pride/data/archive/2019/12/PXD013453
Yeast R2P2 DDA	PXD013453	Mario Leutert, et al.	DDA	S. cerevisiae	QE plus	UWPRQE0277_ML019_IMAC_sp3_triton_2.raw	ftp://ftp.pride.ebi.ac.uk/pride/data/archive/2019/12/PXD013453
Yeast R2P2 DDA	PXD013453	Mario Leutert, et al.	DDA	S. cerevisiae	QE plus	UWPRQE0289_ML019_IMAC_sp3_triton_3.raw	ftp://ftp.pride.ebi.ac.uk/pride/data/archive/2019/12/PXD013453
Yeast R2P2 DDA	PXD013453	Mario Leutert, et al.	DDA	S. cerevisiae	QE plus	UWPRQE0253_ML019_IMAC_sp3_unt_1.raw	ftp://ftp.pride.ebi.ac.uk/pride/data/archive/2019/12/PXD013453
Yeast R2P2 DDA	PXD013453	Mario Leutert, et al.	DDA	S. cerevisiae	QE plus	UWPRQE0269_ML019_IMAC_sp3_unt_2.raw	ftp://ftp.pride.ebi.ac.uk/pride/data/archive/2019/12/PXD013453
Yeast R2P2 DDA	PXD013453	Mario Leutert, et al.	DDA	S. cerevisiae	QE plus	UWPRQE0343_ML019_IMAC_sp3_unt_5.raw	ftp://ftp.pride.ebi.ac.uk/pride/data/archive/2019/12/PXD013453
Yeast R2P2 DDA	PXD013453	Mario Leutert, et al.	DDA	S. cerevisiae	QE plus	UWPRQE0299_ML019_IMAC_Sep_100ug_1.raw	ftp://ftp.pride.ebi.ac.uk/pride/data/archive/2019/12/PXD013453
Yeast R2P2 DDA	PXD013453	Mario Leutert, et al.	DDA	S. cerevisiae	QE plus	UWPRQE0320_ML019_IMAC_Sep_100ug_3.raw	ftp://ftp.pride.ebi.ac.uk/pride/data/archive/2019/12/PXD013453
Yeast R2P2 DDA	PXD013453	Mario Leutert, et al.	DDA	S. cerevisiae	QE plus	UWPRQE0332_ML019_IMAC_Sep_100ug_4.raw	ftp://ftp.pride.ebi.ac.uk/pride/data/archive/2019/12/PXD013453
Yeast R2P2 DDA	PXD013453	Mario Leutert, et al.	DDA	S. cerevisiae	QE plus	UWPRQE0298_ML019_IMAC_SP3_100ug_1.raw	ftp://ftp.pride.ebi.ac.uk/pride/data/archive/2019/12/PXD013453
Yeast R2P2 DDA	PXD013453	Mario Leutert, et al.	DDA	S. cerevisiae	QE plus	UWPRQE0310_ML019_IMAC_SP3_100ug_2.raw	ftp://ftp.pride.ebi.ac.uk/pride/data/archive/2019/12/PXD013453
Yeast R2P2 DDA	PXD013453	Mario Leutert, et al.	DDA	S. cerevisiae	QE plus	UWPRQE0323_ML019_IMAC_SP3_100ug_3.raw	ftp://ftp.pride.ebi.ac.uk/pride/data/archive/2019/12/PXD013453
Yeast R2P2 DDA	PXD013453	Mario Leutert, et al.	DDA	S. cerevisiae	QE plus	UWPRQE0301_ML019_IMAC_Sep_200ug_1.raw	ftp://ftp.pride.ebi.ac.uk/pride/data/archive/2019/12/PXD013453
Yeast R2P2 DDA	PXD013453	Mario Leutert, et al.	DDA	S. cerevisiae	QE plus	UWPRQE0313_ML019_IMAC_Sep_200ug_2.raw	ftp://ftp.pride.ebi.ac.uk/pride/data/archive/2019/12/PXD013453
Yeast R2P2 DDA	PXD013453	Mario Leutert, et al.	DDA	S. cerevisiae	QE plus	UWPRQE0325_ML019_IMAC_Sep_200ug_3.raw	ftp://ftp.pride.ebi.ac.uk/pride/data/archive/2019/12/PXD013453
Yeast R2P2 DDA	PXD013453	Mario Leutert, et al.	DDA	S. cerevisiae	QE plus	UWPRQE0300_ML019_IMAC_SP3_200ug_1.raw	ftp://ftp.pride.ebi.ac.uk/pride/data/archive/2019/12/PXD013453
Yeast R2P2 DDA	PXD013453	Mario Leutert, et al.	DDA	S. cerevisiae	QE plus	UWPRQE0324_ML019_IMAC_SP3_200ug_3.raw	ftp://ftp.pride.ebi.ac.uk/pride/data/archive/2019/12/PXD013453
Yeast R2P2 DDA	PXD013453	Mario Leutert, et al.	DDA	S. cerevisiae	QE plus	UWPRQE0334_ML019_IMAC_SP3_200ug_4.raw	ftp://ftp.pride.ebi.ac.uk/pride/data/archive/2019/12/PXD013453
Yeast R2P2 DDA	PXD013453	Mario Leutert, et al.	DDA	S. cerevisiae	QE plus	UWPRQE0295_ML019_IMAC_Sep_25ug_1.raw	ftp://ftp.pride.ebi.ac.uk/pride/data/archive/2019/12/PXD013453
Yeast R2P2 DDA	PXD013453	Mario Leutert, et al.	DDA	S. cerevisiae	QE plus	UWPRQE0316_ML019_IMAC_Sep_25ug_3.raw	ftp://ftp.pride.ebi.ac.uk/pride/data/archive/2019/12/PXD013453
Yeast R2P2 DDA	PXD013453	Mario Leutert, et al.	DDA	S. cerevisiae	QE plus	UWPRQE0333_ML019_IMAC_Sep_25ug_4.raw	ftp://ftp.pride.ebi.ac.uk/pride/data/archive/2019/12/PXD013453
Yeast R2P2 DDA	PXD013453	Mario Leutert, et al.	DDA	S. cerevisiae	QE plus	UWPRQE0308_ML019_IMAC_SP3_25ug_2.raw	ftp://ftp.pride.ebi.ac.uk/pride/data/archive/2019/12/PXD013453
Yeast R2P2 DDA	PXD013453	Mario Leutert, et al.	DDA	S. cerevisiae	QE plus	UWPRQE0321_ML019_IMAC_SP3_25ug_3.raw	ftp://ftp.pride.ebi.ac.uk/pride/data/archive/2019/12/PXD013453
Yeast R2P2 DDA	PXD013453	Mario Leutert, et al.	DDA	S. cerevisiae	QE plus	UWPRQE0335_ML019_IMAC_SP3_25ug_4.raw	ftp://ftp.pride.ebi.ac.uk/pride/data/archive/2019/12/PXD013453
Yeast R2P2 DDA	PXD013453	Mario Leutert, et al.	DDA	S. cerevisiae	QE plus	UWPRQE0314_ML019_IMAC_Sep_400ug_2.raw	ftp://ftp.pride.ebi.ac.uk/pride/data/archive/2019/12/PXD013453
Yeast R2P2 DDA	PXD013453	Mario Leutert, et al.	DDA	S. cerevisiae	QE plus	UWPRQE0318_ML019_IMAC_Sep_400ug_3.raw	ftp://ftp.pride.ebi.ac.uk/pride/data/archive/2019/12/PXD013453
Yeast R2P2 DDA	PXD013453	Mario Leutert, et al.	DDA	S. cerevisiae	QE plus	UWPRQE0337_ML019_IMAC_Sep_400ug_4.raw	ftp://ftp.pride.ebi.ac.uk/pride/data/archive/2019/12/PXD013453
Yeast R2P2 DDA	PXD013453	Mario Leutert, et al.	DDA	S. cerevisiae	QE plus	UWPRQE0302_ML019_IMAC_SP3_400ug_1.raw	ftp://ftp.pride.ebi.ac.uk/pride/data/archive/2019/12/PXD013453
Yeast R2P2 DDA	PXD013453	Mario Leutert, et al.	DDA	S. cerevisiae	QE plus	UWPRQE0319_ML019_IMAC_SP3_400ug_3.raw	ftp://ftp.pride.ebi.ac.uk/pride/data/archive/2019/12/PXD013453
Yeast R2P2 DDA	PXD013453	Mario Leutert, et al.	DDA	S. cerevisiae	QE plus	UWPRQE0336_ML019_IMAC_SP3_400ug_4.raw	ftp://ftp.pride.ebi.ac.uk/pride/data/archive/2019/12/PXD013453
Yeast R2P2 DDA	PXD013453	Mario Leutert, et al.	DDA	S. cerevisiae	QE plus	UWPRQE0297_ML019_IMAC_Sep_50ug_1.raw	ftp://ftp.pride.ebi.ac.uk/pride/data/archive/2019/12/PXD013453
Yeast R2P2 DDA	PXD013453	Mario Leutert, et al.	DDA	S. cerevisiae	QE plus	UWPRQE0312_ML019_IMAC_Sep_50ug_2.raw	ftp://ftp.pride.ebi.ac.uk/pride/data/archive/2019/12/PXD013453
Yeast R2P2 DDA	PXD013453	Mario Leutert, et al.	DDA	S. cerevisiae	QE plus	UWPRQE0317_ML019_IMAC_Sep_50ug_3.raw	ftp://ftp.pride.ebi.ac.uk/pride/data/archive/2019/12/PXD013453
Yeast R2P2 DDA	PXD013453	Mario Leutert, et al.	DDA	S. cerevisiae	QE plus	UWPRQE0307_ML019_IMAC_SP3_50ug_2.raw	ftp://ftp.pride.ebi.ac.uk/pride/data/archive/2019/12/PXD013453
Yeast R2P2 DDA	PXD013453	Mario Leutert, et al.	DDA	S. cerevisiae	QE plus	UWPRQE0322_ML019_IMAC_SP3_50ug_3.raw	ftp://ftp.pride.ebi.ac.uk/pride/data/archive/2019/12/PXD013453
Yeast R2P2 DDA	PXD013453	Mario Leutert, et al.	DDA	S. cerevisiae	QE plus	UWPRQE0339_ML019_IMAC_SP3_50ug_4.raw	ftp://ftp.pride.ebi.ac.uk/pride/data/archive/2019/12/PXD013453
Yeast R2P2 DDA	PXD013453	Mario Leutert, et al.	DDA	S. cerevisiae	QE	q15476_ML019_IMAC_SP3_FeIMAC_1.raw	ftp://ftp.pride.ebi.ac.uk/pride/data/archive/2019/12/PXD013453
Yeast R2P2 DDA	PXD013453	Mario Leutert, et al.	DDA	S. cerevisiae	QE	q15486_ML019_IMAC_SP3_FeIMAC_2.raw	ftp://ftp.pride.ebi.ac.uk/pride/data/archive/2019/12/PXD013453
Yeast R2P2 DDA	PXD013453	Mario Leutert, et al.	DDA	S. cerevisiae	QE	q15496_ML019_IMAC_SP3_FeIMAC_4.raw	ftp://ftp.pride.ebi.ac.uk/pride/data/archive/2019/12/PXD013453
Yeast R2P2 DDA	PXD013453	Mario Leutert, et al.	DDA	S. cerevisiae	QE	q15484_ML019_IMAC_SP3_TiIMAC_2.raw	ftp://ftp.pride.ebi.ac.uk/pride/data/archive/2019/12/PXD013453
Yeast R2P2 DDA	PXD013453	Mario Leutert, et al.	DDA	S. cerevisiae	QE	q15492_ML019_IMAC_SP3_TiIMAC_3.raw	ftp://ftp.pride.ebi.ac.uk/pride/data/archive/2019/12/PXD013453
Yeast R2P2 DDA	PXD013453	Mario Leutert, et al.	DDA	S. cerevisiae	QE	q15499_ML019_IMAC_SP3_TiIMAC_4.raw	ftp://ftp.pride.ebi.ac.uk/pride/data/archive/2019/12/PXD013453
Yeast R2P2 DDA	PXD013453	Mario Leutert, et al.	DDA	S. cerevisiae	QE	q15480_ML019_IMAC_SP3_TiO2_1.raw	ftp://ftp.pride.ebi.ac.uk/pride/data/archive/2019/12/PXD013453
Yeast R2P2 DDA	PXD013453	Mario Leutert, et al.	DDA	S. cerevisiae	QE	q15494_ML019_IMAC_SP3_TiO2_3.raw	ftp://ftp.pride.ebi.ac.uk/pride/data/archive/2019/12/PXD013453
Yeast R2P2 DDA	PXD013453	Mario Leutert, et al.	DDA	S. cerevisiae	QE	q15501_ML019_IMAC_SP3_TiO2_4.raw	ftp://ftp.pride.ebi.ac.uk/pride/data/archive/2019/12/PXD013453
Yeast R2P2 DDA	PXD013453	Mario Leutert, et al.	DDA	S. cerevisiae	QE	q15485_ML019_IMAC_SP3_ZrIMAC_2.raw	ftp://ftp.pride.ebi.ac.uk/pride/data/archive/2019/12/PXD013453
Yeast R2P2 DDA	PXD013453	Mario Leutert, et al.	DDA	S. cerevisiae	QE	q15479_ML019_IMAC_SP3_ZrIMAC_1.raw	ftp://ftp.pride.ebi.ac.uk/pride/data/archive/2019/12/PXD013453
Yeast R2P2 DDA	PXD013453	Mario Leutert, et al.	DDA	S. cerevisiae	QE	q15489_ML019_IMAC_SP3_ZrIMAC_3.raw	ftp://ftp.pride.ebi.ac.uk/pride/data/archive/2019/12/PXD013453
Yeast R2P2 DDA	PXD013453	Mario Leutert, et al.	DDA	S. cerevisiae	QE	q17073_ML026_IMAC_1.1.raw	ftp://ftp.pride.ebi.ac.uk/pride/data/archive/2019/12/PXD013453
Yeast R2P2 DDA	PXD013453	Mario Leutert, et al.	DDA	S. cerevisiae	QE	q17053_ML026_IMAC_1.2.raw	ftp://ftp.pride.ebi.ac.uk/pride/data/archive/2019/12/PXD013453
Yeast R2P2 DDA	PXD013453	Mario Leutert, et al.	DDA	S. cerevisiae	QE	q17040_ML026_IMAC_1.3.raw	ftp://ftp.pride.ebi.ac.uk/pride/data/archive/2019/12/PXD013453
Yeast R2P2 DDA	PXD013453	Mario Leutert, et al.	DDA	S. cerevisiae	QE	q17071_ML026_IMAC_1.4.raw	ftp://ftp.pride.ebi.ac.uk/pride/data/archive/2019/12/PXD013453
Yeast R2P2 DDA	PXD013453	Mario Leutert, et al.	DDA	S. cerevisiae	QE	q17030_ML026_IMAC_1.5.raw	ftp://ftp.pride.ebi.ac.uk/pride/data/archive/2019/12/PXD013453
Yeast R2P2 DDA	PXD013453	Mario Leutert, et al.	DDA	S. cerevisiae	QE	q17037_ML026_IMAC_2.1.raw	ftp://ftp.pride.ebi.ac.uk/pride/data/archive/2019/12/PXD013453
Yeast R2P2 DDA	PXD013453	Mario Leutert, et al.	DDA	S. cerevisiae	QE	q17046_ML026_IMAC_2.2.raw	ftp://ftp.pride.ebi.ac.uk/pride/data/archive/2019/12/PXD013453
Yeast R2P2 DDA	PXD013453	Mario Leutert, et al.	DDA	S. cerevisiae	QE	q17051_ML026_IMAC_2.3.raw	ftp://ftp.pride.ebi.ac.uk/pride/data/archive/2019/12/PXD013453
Yeast R2P2 DDA	PXD013453	Mario Leutert, et al.	DDA	S. cerevisiae	QE	q17068_ML026_IMAC_2.4.raw	ftp://ftp.pride.ebi.ac.uk/pride/data/archive/2019/12/PXD013453
Yeast R2P2 DDA	PXD013453	Mario Leutert, et al.	DDA	S. cerevisiae	QE	q17072_ML026_IMAC_2.5.raw	ftp://ftp.pride.ebi.ac.uk/pride/data/archive/2019/12/PXD013453
Yeast R2P2 DDA	PXD013453	Mario Leutert, et al.	DDA	S. cerevisiae	QE	q17067_ML026_IMAC_4.1.raw	ftp://ftp.pride.ebi.ac.uk/pride/data/archive/2019/12/PXD013453
Yeast R2P2 DDA	PXD013453	Mario Leutert, et al.	DDA	S. cerevisiae	QE	q17064_ML026_IMAC_4.2.raw	ftp://ftp.pride.ebi.ac.uk/pride/data/archive/2019/12/PXD013453
Yeast R2P2 DDA	PXD013453	Mario Leutert, et al.	DDA	S. cerevisiae	QE	q17031_ML026_IMAC_4.3.raw	ftp://ftp.pride.ebi.ac.uk/pride/data/archive/2019/12/PXD013453
Yeast R2P2 DDA	PXD013453	Mario Leutert, et al.	DDA	S. cerevisiae	QE	q17044_ML026_IMAC_4.4.raw	ftp://ftp.pride.ebi.ac.uk/pride/data/archive/2019/12/PXD013453
Yeast R2P2 DDA	PXD013453	Mario Leutert, et al.	DDA	S. cerevisiae	QE	q17047_ML026_IMAC_4.5.raw	ftp://ftp.pride.ebi.ac.uk/pride/data/archive/2019/12/PXD013453
Yeast R2P2 DDA	PXD013453	Mario Leutert, et al.	DDA	S. cerevisiae	QE	q17050_ML026_IMAC_5.1.raw	ftp://ftp.pride.ebi.ac.uk/pride/data/archive/2019/12/PXD013453
Yeast R2P2 DDA	PXD013453	Mario Leutert, et al.	DDA	S. cerevisiae	QE	q17052_ML026_IMAC_5.2.raw	ftp://ftp.pride.ebi.ac.uk/pride/data/archive/2019/12/PXD013453
Yeast R2P2 DDA	PXD013453	Mario Leutert, et al.	DDA	S. cerevisiae	QE	q17061_ML026_IMAC_5.3.raw	ftp://ftp.pride.ebi.ac.uk/pride/data/archive/2019/12/PXD013453
Yeast R2P2 DDA	PXD013453	Mario Leutert, et al.	DDA	S. cerevisiae	QE	q17060_ML026_IMAC_5.4.raw	ftp://ftp.pride.ebi.ac.uk/pride/data/archive/2019/12/PXD013453
Yeast R2P2 DDA	PXD013453	Mario Leutert, et al.	DDA	S. cerevisiae	QE	q17081_ML026_IMAC_5.5.raw	ftp://ftp.pride.ebi.ac.uk/pride/data/archive/2019/12/PXD013453
Yeast R2P2 DDA	PXD013453	Mario Leutert, et al.	DDA	S. cerevisiae	QE	q17055_ML026_IMAC_6.1.raw	ftp://ftp.pride.ebi.ac.uk/pride/data/archive/2019/12/PXD013453
Yeast R2P2 DDA	PXD013453	Mario Leutert, et al.	DDA	S. cerevisiae	QE	q17066_ML026_IMAC_6.2.raw	ftp://ftp.pride.ebi.ac.uk/pride/data/archive/2019/12/PXD013453
Yeast R2P2 DDA	PXD013453	Mario Leutert, et al.	DDA	S. cerevisiae	QE	q17062_ML026_IMAC_6.3.raw	ftp://ftp.pride.ebi.ac.uk/pride/data/archive/2019/12/PXD013453
Yeast R2P2 DDA	PXD013453	Mario Leutert, et al.	DDA	S. cerevisiae	QE	q17039_ML026_IMAC_6.4.raw	ftp://ftp.pride.ebi.ac.uk/pride/data/archive/2019/12/PXD013453
Yeast R2P2 DDA	PXD013453	Mario Leutert, et al.	DDA	S. cerevisiae	QE	q17057_ML026_IMAC_6.5.raw	ftp://ftp.pride.ebi.ac.uk/pride/data/archive/2019/12/PXD013453
Yeast R2P2 DDA	PXD013453	Mario Leutert, et al.	DDA	S. cerevisiae	QE	q17110_ML026_total_1.1.raw	ftp://ftp.pride.ebi.ac.uk/pride/data/archive/2019/12/PXD013453
Yeast R2P2 DDA	PXD013453	Mario Leutert, et al.	DDA	S. cerevisiae	QE	q17122_ML026_total_1.2.raw	ftp://ftp.pride.ebi.ac.uk/pride/data/archive/2019/12/PXD013453
Yeast R2P2 DDA	PXD013453	Mario Leutert, et al.	DDA	S. cerevisiae	QE	q17103_ML026_total_1.3.raw	ftp://ftp.pride.ebi.ac.uk/pride/data/archive/2019/12/PXD013453
Yeast R2P2 DDA	PXD013453	Mario Leutert, et al.	DDA	S. cerevisiae	QE	q17095_ML026_total_1.4.raw	ftp://ftp.pride.ebi.ac.uk/pride/data/archive/2019/12/PXD013453
Yeast R2P2 DDA	PXD013453	Mario Leutert, et al.	DDA	S. cerevisiae	QE	q17123_ML026_total_1.5.raw	ftp://ftp.pride.ebi.ac.uk/pride/data/archive/2019/12/PXD013453
Yeast R2P2 DDA	PXD013453	Mario Leutert, et al.	DDA	S. cerevisiae	QE	q17119_ML026_total_2.1.raw	ftp://ftp.pride.ebi.ac.uk/pride/data/archive/2019/12/PXD013453
Yeast R2P2 DDA	PXD013453	Mario Leutert, et al.	DDA	S. cerevisiae	QE	q17115_ML026_total_2.2.raw	ftp://ftp.pride.ebi.ac.uk/pride/data/archive/2019/12/PXD013453
Yeast R2P2 DDA	PXD013453	Mario Leutert, et al.	DDA	S. cerevisiae	QE	q17105_ML026_total_2.3.raw	ftp://ftp.pride.ebi.ac.uk/pride/data/archive/2019/12/PXD013453
Yeast R2P2 DDA	PXD013453	Mario Leutert, et al.	DDA	S. cerevisiae	QE	q17101_ML026_total_2.4.raw	ftp://ftp.pride.ebi.ac.uk/pride/data/archive/2019/12/PXD013453
Yeast R2P2 DDA	PXD013453	Mario Leutert, et al.	DDA	S. cerevisiae	QE	q17125_ML026_total_2.5.raw	ftp://ftp.pride.ebi.ac.uk/pride/data/archive/2019/12/PXD013453
Yeast R2P2 DDA	PXD013453	Mario Leutert, et al.	DDA	S. cerevisiae	QE	q17107_ML026_total_4.1.raw	ftp://ftp.pride.ebi.ac.uk/pride/data/archive/2019/12/PXD013453
Yeast R2P2 DDA	PXD013453	Mario Leutert, et al.	DDA	S. cerevisiae	QE	q17114_ML026_total_4.2.raw	ftp://ftp.pride.ebi.ac.uk/pride/data/archive/2019/12/PXD013453
Yeast R2P2 DDA	PXD013453	Mario Leutert, et al.	DDA	S. cerevisiae	QE	q17094_ML026_total_4.3.raw	ftp://ftp.pride.ebi.ac.uk/pride/data/archive/2019/12/PXD013453
Yeast R2P2 DDA	PXD013453	Mario Leutert, et al.	DDA	S. cerevisiae	QE	q17117_ML026_total_4.4.raw	ftp://ftp.pride.ebi.ac.uk/pride/data/archive/2019/12/PXD013453
Yeast R2P2 DDA	PXD013453	Mario Leutert, et al.	DDA	S. cerevisiae	QE	q17104_ML026_total_4.5.raw	ftp://ftp.pride.ebi.ac.uk/pride/data/archive/2019/12/PXD013453
Yeast R2P2 DDA	PXD013453	Mario Leutert, et al.	DDA	S. cerevisiae	QE	q17102_ML026_total_5.1.raw	ftp://ftp.pride.ebi.ac.uk/pride/data/archive/2019/12/PXD013453
Yeast R2P2 DDA	PXD013453	Mario Leutert, et al.	DDA	S. cerevisiae	QE	q17097_ML026_total_5.2.raw	ftp://ftp.pride.ebi.ac.uk/pride/data/archive/2019/12/PXD013453
Yeast R2P2 DDA	PXD013453	Mario Leutert, et al.	DDA	S. cerevisiae	QE	q17108_ML026_total_5.3.raw	ftp://ftp.pride.ebi.ac.uk/pride/data/archive/2019/12/PXD013453
Yeast R2P2 DDA	PXD013453	Mario Leutert, et al.	DDA	S. cerevisiae	QE	q17121_ML026_total_5.4.raw	ftp://ftp.pride.ebi.ac.uk/pride/data/archive/2019/12/PXD013453
Yeast R2P2 DDA	PXD013453	Mario Leutert, et al.	DDA	S. cerevisiae	QE	q17120_ML026_total_5.5.raw	ftp://ftp.pride.ebi.ac.uk/pride/data/archive/2019/12/PXD013453
Yeast R2P2 DDA	PXD013453	Mario Leutert, et al.	DDA	S. cerevisiae	QE	q17109_ML026_total_6.2.raw	ftp://ftp.pride.ebi.ac.uk/pride/data/archive/2019/12/PXD013453
Yeast R2P2 DDA	PXD013453	Mario Leutert, et al.	DDA	S. cerevisiae	QE	q17096_ML026_total_6.3.raw	ftp://ftp.pride.ebi.ac.uk/pride/data/archive/2019/12/PXD013453
Yeast R2P2 DDA	PXD013453	Mario Leutert, et al.	DDA	S. cerevisiae	QE	q17129_ML026_total_6.4.raw	ftp://ftp.pride.ebi.ac.uk/pride/data/archive/2019/12/PXD013453
Yeast R2P2 DDA	PXD013453	Mario Leutert, et al.	DDA	S. cerevisiae	QE	q17111_ML026_total_6.5.raw	ftp://ftp.pride.ebi.ac.uk/pride/data/archive/2019/12/PXD013453
Yeast R2P2 DDA	PXD013453	Mario Leutert, et al.	DDA	S. cerevisiae	QE	q17116_ML026_total_6.6.raw	ftp://ftp.pride.ebi.ac.uk/pride/data/archive/2019/12/PXD013453
Vero E6 DIA	PXD019113	Mehdi Bouhaddou, et al.	DIA	African green monkey kidney epithelial Vero E6	Exploris 480	LP1_01_AB_DIA_139.raw	ftp://ftp.pride.ebi.ac.uk/pride/data/archive/2020/07/PXD019113
Vero E6 DIA	PXD019113	Mehdi Bouhaddou, et al.	DIA	African green monkey kidney epithelial Vero E6	Exploris 480	LP1_01_phos_DIA_113.raw	ftp://ftp.pride.ebi.ac.uk/pride/data/archive/2020/07/PXD019113
Vero E6 DIA	PXD019113	Mehdi Bouhaddou, et al.	DIA	African green monkey kidney epithelial Vero E6	Exploris 480	LP1_02_AB_DIA_140.raw	ftp://ftp.pride.ebi.ac.uk/pride/data/archive/2020/07/PXD019113
Vero E6 DIA	PXD019113	Mehdi Bouhaddou, et al.	DIA	African green monkey kidney epithelial Vero E6	Exploris 480	LP1_02_phos_DIA_112.raw	ftp://ftp.pride.ebi.ac.uk/pride/data/archive/2020/07/PXD019113
Vero E6 DIA	PXD019113	Mehdi Bouhaddou, et al.	DIA	African green monkey kidney epithelial Vero E6	Exploris 480	LP1_03_AB_DIA_141.raw	ftp://ftp.pride.ebi.ac.uk/pride/data/archive/2020/07/PXD019113
Vero E6 DIA	PXD019113	Mehdi Bouhaddou, et al.	DIA	African green monkey kidney epithelial Vero E6	Exploris 480	LP1_03_phos_DIA_111.raw	ftp://ftp.pride.ebi.ac.uk/pride/data/archive/2020/07/PXD019113
Vero E6 DIA	PXD019113	Mehdi Bouhaddou, et al.	DIA	African green monkey kidney epithelial Vero E6	Exploris 480	LP1_04_AB_DIA_143.raw	ftp://ftp.pride.ebi.ac.uk/pride/data/archive/2020/07/PXD019113
Vero E6 DIA	PXD019113	Mehdi Bouhaddou, et al.	DIA	African green monkey kidney epithelial Vero E6	Exploris 480	LP1_04_phos_DIA_111.raw	ftp://ftp.pride.ebi.ac.uk/pride/data/archive/2020/07/PXD019113
Vero E6 DIA	PXD019113	Mehdi Bouhaddou, et al.	DIA	African green monkey kidney epithelial Vero E6	Exploris 480	LP1_05_AB_DIA_144.raw	ftp://ftp.pride.ebi.ac.uk/pride/data/archive/2020/07/PXD019113
Vero E6 DIA	PXD019113	Mehdi Bouhaddou, et al.	DIA	African green monkey kidney epithelial Vero E6	Exploris 480	LP1_05_phos_DIA_112.raw	ftp://ftp.pride.ebi.ac.uk/pride/data/archive/2020/07/PXD019113
Vero E6 DIA	PXD019113	Mehdi Bouhaddou, et al.	DIA	African green monkey kidney epithelial Vero E6	Exploris 480	LP1_06_AB_DIA_145.raw	ftp://ftp.pride.ebi.ac.uk/pride/data/archive/2020/07/PXD019113
Vero E6 DIA	PXD019113	Mehdi Bouhaddou, et al.	DIA	African green monkey kidney epithelial Vero E6	Exploris 480	LP1_06_phos_DIA_113.raw	ftp://ftp.pride.ebi.ac.uk/pride/data/archive/2020/07/PXD019113
Vero E6 DIA	PXD019113	Mehdi Bouhaddou, et al.	DIA	African green monkey kidney epithelial Vero E6	Exploris 480	LP1_07_AB_DIA_143.raw	ftp://ftp.pride.ebi.ac.uk/pride/data/archive/2020/07/PXD019113
Vero E6 DIA	PXD019113	Mehdi Bouhaddou, et al.	DIA	African green monkey kidney epithelial Vero E6	Exploris 480	LP1_07_phos_DIA_119.raw	ftp://ftp.pride.ebi.ac.uk/pride/data/archive/2020/07/PXD019113
Vero E6 DIA	PXD019113	Mehdi Bouhaddou, et al.	DIA	African green monkey kidney epithelial Vero E6	Exploris 480	LP1_08_AB_DIA_144.raw	ftp://ftp.pride.ebi.ac.uk/pride/data/archive/2020/07/PXD019113
Vero E6 DIA	PXD019113	Mehdi Bouhaddou, et al.	DIA	African green monkey kidney epithelial Vero E6	Exploris 480	LP1_08_phos_DIA_120.raw	ftp://ftp.pride.ebi.ac.uk/pride/data/archive/2020/07/PXD019113
Vero E6 DIA	PXD019113	Mehdi Bouhaddou, et al.	DIA	African green monkey kidney epithelial Vero E6	Exploris 480	LP1_09_AB_DIA_145.raw	ftp://ftp.pride.ebi.ac.uk/pride/data/archive/2020/07/PXD019113
Vero E6 DIA	PXD019113	Mehdi Bouhaddou, et al.	DIA	African green monkey kidney epithelial Vero E6	Exploris 480	LP1_09_phos_DIA_121.raw	ftp://ftp.pride.ebi.ac.uk/pride/data/archive/2020/07/PXD019113
Vero E6 DIA	PXD019113	Mehdi Bouhaddou, et al.	DIA	African green monkey kidney epithelial Vero E6	Exploris 480	LP1_10_AB_DIA_147.raw	ftp://ftp.pride.ebi.ac.uk/pride/data/archive/2020/07/PXD019113
Vero E6 DIA	PXD019113	Mehdi Bouhaddou, et al.	DIA	African green monkey kidney epithelial Vero E6	Exploris 480	LP1_10_phos_DIA_123.raw	ftp://ftp.pride.ebi.ac.uk/pride/data/archive/2020/07/PXD019113
Vero E6 DIA	PXD019113	Mehdi Bouhaddou, et al.	DIA	African green monkey kidney epithelial Vero E6	Exploris 480	LP1_11_AB_DIA_148.raw	ftp://ftp.pride.ebi.ac.uk/pride/data/archive/2020/07/PXD019113
Vero E6 DIA	PXD019113	Mehdi Bouhaddou, et al.	DIA	African green monkey kidney epithelial Vero E6	Exploris 480	LP1_11_phos_DIA_124.raw	ftp://ftp.pride.ebi.ac.uk/pride/data/archive/2020/07/PXD019113
Vero E6 DIA	PXD019113	Mehdi Bouhaddou, et al.	DIA	African green monkey kidney epithelial Vero E6	Exploris 480	LP1_12_AB_DIA_149.raw	ftp://ftp.pride.ebi.ac.uk/pride/data/archive/2020/07/PXD019113
Vero E6 DIA	PXD019113	Mehdi Bouhaddou, et al.	DIA	African green monkey kidney epithelial Vero E6	Exploris 480	LP1_12_phos_DIA_125.raw	ftp://ftp.pride.ebi.ac.uk/pride/data/archive/2020/07/PXD019113
Vero E6 DIA	PXD019113	Mehdi Bouhaddou, et al.	DIA	African green monkey kidney epithelial Vero E6	Exploris 480	LP1_13_AB_DIA_151.raw	ftp://ftp.pride.ebi.ac.uk/pride/data/archive/2020/07/PXD019113
Vero E6 DIA	PXD019113	Mehdi Bouhaddou, et al.	DIA	African green monkey kidney epithelial Vero E6	Exploris 480	LP1_13_phos_DIA_127.raw	ftp://ftp.pride.ebi.ac.uk/pride/data/archive/2020/07/PXD019113
Vero E6 DIA	PXD019113	Mehdi Bouhaddou, et al.	DIA	African green monkey kidney epithelial Vero E6	Exploris 480	LP1_14_AB_DIA_152.raw	ftp://ftp.pride.ebi.ac.uk/pride/data/archive/2020/07/PXD019113
Vero E6 DIA	PXD019113	Mehdi Bouhaddou, et al.	DIA	African green monkey kidney epithelial Vero E6	Exploris 480	LP1_14_phos_DIA_128.raw	ftp://ftp.pride.ebi.ac.uk/pride/data/archive/2020/07/PXD019113
Vero E6 DIA	PXD019113	Mehdi Bouhaddou, et al.	DIA	African green monkey kidney epithelial Vero E6	Exploris 480	LP1_15_AB_DIA_153.raw	ftp://ftp.pride.ebi.ac.uk/pride/data/archive/2020/07/PXD019113
Vero E6 DIA	PXD019113	Mehdi Bouhaddou, et al.	DIA	African green monkey kidney epithelial Vero E6	Exploris 480	LP1_15_phos_DIA_129.raw	ftp://ftp.pride.ebi.ac.uk/pride/data/archive/2020/07/PXD019113
Vero E6 DIA	PXD019113	Mehdi Bouhaddou, et al.	DIA	African green monkey kidney epithelial Vero E6	Exploris 480	LP1_16_AB_DIA_155.raw	ftp://ftp.pride.ebi.ac.uk/pride/data/archive/2020/07/PXD019113
Vero E6 DIA	PXD019113	Mehdi Bouhaddou, et al.	DIA	African green monkey kidney epithelial Vero E6	Exploris 480	LP1_16_phos_DIA_131.raw	ftp://ftp.pride.ebi.ac.uk/pride/data/archive/2020/07/PXD019113
Vero E6 DIA	PXD019113	Mehdi Bouhaddou, et al.	DIA	African green monkey kidney epithelial Vero E6	Exploris 480	LP1_17_AB_DIA_156.raw	ftp://ftp.pride.ebi.ac.uk/pride/data/archive/2020/07/PXD019113
Vero E6 DIA	PXD019113	Mehdi Bouhaddou, et al.	DIA	African green monkey kidney epithelial Vero E6	Exploris 480	LP1_17_phos_DIA_132.raw	ftp://ftp.pride.ebi.ac.uk/pride/data/archive/2020/07/PXD019113
Vero E6 DIA	PXD019113	Mehdi Bouhaddou, et al.	DIA	African green monkey kidney epithelial Vero E6	Exploris 480	LP1_18_AB_DIA_157.raw	ftp://ftp.pride.ebi.ac.uk/pride/data/archive/2020/07/PXD019113
Vero E6 DIA	PXD019113	Mehdi Bouhaddou, et al.	DIA	African green monkey kidney epithelial Vero E6	Exploris 480	LP1_18_phos_DIA_133.raw	ftp://ftp.pride.ebi.ac.uk/pride/data/archive/2020/07/PXD019113
Vero E6 DIA	PXD019113	Mehdi Bouhaddou, et al.	DIA	African green monkey kidney epithelial Vero E6	Exploris 480	LP1_19_AB_DIA_159.raw	ftp://ftp.pride.ebi.ac.uk/pride/data/archive/2020/07/PXD019113
Vero E6 DIA	PXD019113	Mehdi Bouhaddou, et al.	DIA	African green monkey kidney epithelial Vero E6	Exploris 480	LP1_19_phos_DIA_135.raw	ftp://ftp.pride.ebi.ac.uk/pride/data/archive/2020/07/PXD019113
Vero E6 DIA	PXD019113	Mehdi Bouhaddou, et al.	DIA	African green monkey kidney epithelial Vero E6	Exploris 480	LP1_20_AB_DIA_160.raw	ftp://ftp.pride.ebi.ac.uk/pride/data/archive/2020/07/PXD019113
Vero E6 DIA	PXD019113	Mehdi Bouhaddou, et al.	DIA	African green monkey kidney epithelial Vero E6	Exploris 480	LP1_20_phos_DIA_136.raw	ftp://ftp.pride.ebi.ac.uk/pride/data/archive/2020/07/PXD019113
Vero E6 DIA	PXD019113	Mehdi Bouhaddou, et al.	DIA	African green monkey kidney epithelial Vero E6	Exploris 480	LP1_21_AB_DIA_161.raw	ftp://ftp.pride.ebi.ac.uk/pride/data/archive/2020/07/PXD019113
Vero E6 DIA	PXD019113	Mehdi Bouhaddou, et al.	DIA	African green monkey kidney epithelial Vero E6	Exploris 480	LP1_21_phos_DIA_137.raw	ftp://ftp.pride.ebi.ac.uk/pride/data/archive/2020/07/PXD019113
Vero E6 DIA	PXD019113	Mehdi Bouhaddou, et al.	DIA	African green monkey kidney epithelial Vero E6	Exploris 480	LP1_22_AB_DIA_163.raw	ftp://ftp.pride.ebi.ac.uk/pride/data/archive/2020/07/PXD019113
Vero E6 DIA	PXD019113	Mehdi Bouhaddou, et al.	DIA	African green monkey kidney epithelial Vero E6	Exploris 480	LP1_22_phos_DIA_115.raw	ftp://ftp.pride.ebi.ac.uk/pride/data/archive/2020/07/PXD019113
Vero E6 DIA	PXD019113	Mehdi Bouhaddou, et al.	DIA	African green monkey kidney epithelial Vero E6	Exploris 480	LP1_23_AB_DIA_164.raw	ftp://ftp.pride.ebi.ac.uk/pride/data/archive/2020/07/PXD019113
Vero E6 DIA	PXD019113	Mehdi Bouhaddou, et al.	DIA	African green monkey kidney epithelial Vero E6	Exploris 480	LP1_23_phos_DIA_116.raw	ftp://ftp.pride.ebi.ac.uk/pride/data/archive/2020/07/PXD019113
Vero E6 DIA	PXD019113	Mehdi Bouhaddou, et al.	DIA	African green monkey kidney epithelial Vero E6	Exploris 480	LP1_24_AB_DIA_165.raw	ftp://ftp.pride.ebi.ac.uk/pride/data/archive/2020/07/PXD019113
Vero E6 DIA	PXD019113	Mehdi Bouhaddou, et al.	DIA	African green monkey kidney epithelial Vero E6	Exploris 480	LP1_24_phos_DIA_117.raw	ftp://ftp.pride.ebi.ac.uk/pride/data/archive/2020/07/PXD019113
Yeast R2P2 DIA	PXD013453	Mario Leutert, et al.	DIA	S. cerevisiae	Fusion Lumos	UWPROFL0610_ML019_IMAC_02glu_10_1.raw	ftp://ftp.pride.ebi.ac.uk/pride/data/archive/2019/12/PXD013453
Yeast R2P2 DIA	PXD013453	Mario Leutert, et al.	DIA	S. cerevisiae	Fusion Lumos	UWPROFL0641_ML019_IMAC_02glu_10_2.raw	ftp://ftp.pride.ebi.ac.uk/pride/data/archive/2019/12/PXD013453
Yeast R2P2 DIA	PXD013453	Mario Leutert, et al.	DIA	S. cerevisiae	Fusion Lumos	UWPROFL0654_ML019_IMAC_02glu_10_3.raw	ftp://ftp.pride.ebi.ac.uk/pride/data/archive/2019/12/PXD013453
Yeast R2P2 DIA	PXD013453	Mario Leutert, et al.	DIA	S. cerevisiae	Fusion Lumos	UWPROFL0611_ML019_IMAC_02glu_30_1.raw	ftp://ftp.pride.ebi.ac.uk/pride/data/archive/2019/12/PXD013453
Yeast R2P2 DIA	PXD013453	Mario Leutert, et al.	DIA	S. cerevisiae	Fusion Lumos	UWPROFL0642_ML019_IMAC_02glu_30_2.raw	ftp://ftp.pride.ebi.ac.uk/pride/data/archive/2019/12/PXD013453
Yeast R2P2 DIA	PXD013453	Mario Leutert, et al.	DIA	S. cerevisiae	Fusion Lumos	UWPROFL0655_ML019_IMAC_02glu_30_3.raw	ftp://ftp.pride.ebi.ac.uk/pride/data/archive/2019/12/PXD013453
Yeast R2P2 DIA	PXD013453	Mario Leutert, et al.	DIA	S. cerevisiae	Fusion Lumos	UWPROFL0612_ML019_IMAC_02glu_90_1.raw	ftp://ftp.pride.ebi.ac.uk/pride/data/archive/2019/12/PXD013453
Yeast R2P2 DIA	PXD013453	Mario Leutert, et al.	DIA	S. cerevisiae	Fusion Lumos	UWPROFL0643_ML019_IMAC_02glu_90_2.raw	ftp://ftp.pride.ebi.ac.uk/pride/data/archive/2019/12/PXD013453
Yeast R2P2 DIA	PXD013453	Mario Leutert, et al.	DIA	S. cerevisiae	Fusion Lumos	UWPROFL0656_ML019_IMAC_02glu_90_3.raw	ftp://ftp.pride.ebi.ac.uk/pride/data/archive/2019/12/PXD013453
Yeast R2P2 DIA	PXD013453	Mario Leutert, et al.	DIA	S. cerevisiae	Fusion Lumos	UWPROFL0613_ML019_IMAC_20gala_10_1.raw	ftp://ftp.pride.ebi.ac.uk/pride/data/archive/2019/12/PXD013453
Yeast R2P2 DIA	PXD013453	Mario Leutert, et al.	DIA	S. cerevisiae	Fusion Lumos	UWPROFL0660_ML019_IMAC_20gala_10_3.raw	ftp://ftp.pride.ebi.ac.uk/pride/data/archive/2019/12/PXD013453
Yeast R2P2 DIA	PXD013453	Mario Leutert, et al.	DIA	S. cerevisiae	Fusion Lumos	UWPROFL0614_ML019_IMAC_20gala_30_1.raw	ftp://ftp.pride.ebi.ac.uk/pride/data/archive/2019/12/PXD013453
Yeast R2P2 DIA	PXD013453	Mario Leutert, et al.	DIA	S. cerevisiae	Fusion Lumos	UWPROFL0661_ML019_IMAC_20gala_30_3.raw	ftp://ftp.pride.ebi.ac.uk/pride/data/archive/2019/12/PXD013453
Yeast R2P2 DIA	PXD013453	Mario Leutert, et al.	DIA	S. cerevisiae	Fusion Lumos	UWPROFL0615_ML019_IMAC_20gala_90_1.raw	ftp://ftp.pride.ebi.ac.uk/pride/data/archive/2019/12/PXD013453
Yeast R2P2 DIA	PXD013453	Mario Leutert, et al.	DIA	S. cerevisiae	Fusion Lumos	UWPROFL0662_ML019_IMAC_20gala_90_3.raw	ftp://ftp.pride.ebi.ac.uk/pride/data/archive/2019/12/PXD013453
Yeast R2P2 DIA	PXD013453	Mario Leutert, et al.	DIA	S. cerevisiae	Fusion Lumos	UWPROFL0600_ML019_IMAC_alpha_10_1.raw	ftp://ftp.pride.ebi.ac.uk/pride/data/archive/2019/12/PXD013453
Yeast R2P2 DIA	PXD013453	Mario Leutert, et al.	DIA	S. cerevisiae	Fusion Lumos	UWPROFL0624_ML019_IMAC_alpha_10_2.raw	ftp://ftp.pride.ebi.ac.uk/pride/data/archive/2019/12/PXD013453
Yeast R2P2 DIA	PXD013453	Mario Leutert, et al.	DIA	S. cerevisiae	Fusion Lumos	UWPROFL0664_ML019_IMAC_alpha_10_3.raw	ftp://ftp.pride.ebi.ac.uk/pride/data/archive/2019/12/PXD013453
Yeast R2P2 DIA	PXD013453	Mario Leutert, et al.	DIA	S. cerevisiae	Fusion Lumos	UWPROFL0601_ML019_IMAC_alpha_30_1.raw	ftp://ftp.pride.ebi.ac.uk/pride/data/archive/2019/12/PXD013453
Yeast R2P2 DIA	PXD013453	Mario Leutert, et al.	DIA	S. cerevisiae	Fusion Lumos	UWPROFL0625_ML019_IMAC_alpha_30_2.raw	ftp://ftp.pride.ebi.ac.uk/pride/data/archive/2019/12/PXD013453
Yeast R2P2 DIA	PXD013453	Mario Leutert, et al.	DIA	S. cerevisiae	Fusion Lumos	UWPROFL0665_ML019_IMAC_alpha_30_3.raw	ftp://ftp.pride.ebi.ac.uk/pride/data/archive/2019/12/PXD013453
Yeast R2P2 DIA	PXD013453	Mario Leutert, et al.	DIA	S. cerevisiae	Fusion Lumos	UWPROFL0602_ML019_IMAC_alpha_90_1.raw	ftp://ftp.pride.ebi.ac.uk/pride/data/archive/2019/12/PXD013453
Yeast R2P2 DIA	PXD013453	Mario Leutert, et al.	DIA	S. cerevisiae	Fusion Lumos	UWPROFL0626_ML019_IMAC_alpha_90_2.raw	ftp://ftp.pride.ebi.ac.uk/pride/data/archive/2019/12/PXD013453
Yeast R2P2 DIA	PXD013453	Mario Leutert, et al.	DIA	S. cerevisiae	Fusion Lumos	UWPROFL0666_ML019_IMAC_alpha_90_3.raw	ftp://ftp.pride.ebi.ac.uk/pride/data/archive/2019/12/PXD013453
Yeast R2P2 DIA	PXD013453	Mario Leutert, et al.	DIA	S. cerevisiae	Fusion Lumos	UWPROFL0606_ML019_IMAC_butanol_10_1.raw	ftp://ftp.pride.ebi.ac.uk/pride/data/archive/2019/12/PXD013453
Yeast R2P2 DIA	PXD013453	Mario Leutert, et al.	DIA	S. cerevisiae	Fusion Lumos	UWPROFL0619_ML019_IMAC_butanol_10_2.raw	ftp://ftp.pride.ebi.ac.uk/pride/data/archive/2019/12/PXD013453
Yeast R2P2 DIA	PXD013453	Mario Leutert, et al.	DIA	S. cerevisiae	Fusion Lumos	UWPROFL0657_ML019_IMAC_butanol_10_3.raw	ftp://ftp.pride.ebi.ac.uk/pride/data/archive/2019/12/PXD013453
Yeast R2P2 DIA	PXD013453	Mario Leutert, et al.	DIA	S. cerevisiae	Fusion Lumos	UWPROFL0607_ML019_IMAC_butanol_30_1.raw	ftp://ftp.pride.ebi.ac.uk/pride/data/archive/2019/12/PXD013453
Yeast R2P2 DIA	PXD013453	Mario Leutert, et al.	DIA	S. cerevisiae	Fusion Lumos	UWPROFL0620_ML019_IMAC_butanol_30_2.raw	ftp://ftp.pride.ebi.ac.uk/pride/data/archive/2019/12/PXD013453
Yeast R2P2 DIA	PXD013453	Mario Leutert, et al.	DIA	S. cerevisiae	Fusion Lumos	UWPROFL0658_ML019_IMAC_butanol_30_3.raw	ftp://ftp.pride.ebi.ac.uk/pride/data/archive/2019/12/PXD013453
Yeast R2P2 DIA	PXD013453	Mario Leutert, et al.	DIA	S. cerevisiae	Fusion Lumos	UWPROFL0608_ML019_IMAC_butanol_90_1.raw	ftp://ftp.pride.ebi.ac.uk/pride/data/archive/2019/12/PXD013453
Yeast R2P2 DIA	PXD013453	Mario Leutert, et al.	DIA	S. cerevisiae	Fusion Lumos	UWPROFL0621_ML019_IMAC_butanol_90_2.raw	ftp://ftp.pride.ebi.ac.uk/pride/data/archive/2019/12/PXD013453
Yeast R2P2 DIA	PXD013453	Mario Leutert, et al.	DIA	S. cerevisiae	Fusion Lumos	UWPROFL0659_ML019_IMAC_butanol_90_3.raw	ftp://ftp.pride.ebi.ac.uk/pride/data/archive/2019/12/PXD013453
Yeast R2P2 DIA	PXD013453	Mario Leutert, et al.	DIA	S. cerevisiae	Fusion Lumos	UWPROFL0647_ML019_IMAC_Gala_10_2.raw	ftp://ftp.pride.ebi.ac.uk/pride/data/archive/2019/12/PXD013453
Yeast R2P2 DIA	PXD013453	Mario Leutert, et al.	DIA	S. cerevisiae	Fusion Lumos	UWPROFL0648_ML019_IMAC_Gala_30_2.raw	ftp://ftp.pride.ebi.ac.uk/pride/data/archive/2019/12/PXD013453
Yeast R2P2 DIA	PXD013453	Mario Leutert, et al.	DIA	S. cerevisiae	Fusion Lumos	UWPROFL0649_ML019_IMAC_Gala_90_2.raw	ftp://ftp.pride.ebi.ac.uk/pride/data/archive/2019/12/PXD013453
Yeast R2P2 DIA	PXD013453	Mario Leutert, et al.	DIA	S. cerevisiae	Fusion Lumos	UWPROFL0603_ML019_IMAC_NaCl_10_1.raw	ftp://ftp.pride.ebi.ac.uk/pride/data/archive/2019/12/PXD013453
Yeast R2P2 DIA	PXD013453	Mario Leutert, et al.	DIA	S. cerevisiae	Fusion Lumos	UWPROFL0634_ML019_IMAC_NaCl_10_2.raw	ftp://ftp.pride.ebi.ac.uk/pride/data/archive/2019/12/PXD013453
Yeast R2P2 DIA	PXD013453	Mario Leutert, et al.	DIA	S. cerevisiae	Fusion Lumos	UWPROFL0651_ML019_IMAC_NaCl_10_3.raw	ftp://ftp.pride.ebi.ac.uk/pride/data/archive/2019/12/PXD013453
Yeast R2P2 DIA	PXD013453	Mario Leutert, et al.	DIA	S. cerevisiae	Fusion Lumos	UWPROFL0604_ML019_IMAC_NaCl_30_1.raw	ftp://ftp.pride.ebi.ac.uk/pride/data/archive/2019/12/PXD013453
Yeast R2P2 DIA	PXD013453	Mario Leutert, et al.	DIA	S. cerevisiae	Fusion Lumos	UWPROFL0635_ML019_IMAC_NaCl_30_2.raw	ftp://ftp.pride.ebi.ac.uk/pride/data/archive/2019/12/PXD013453
Yeast R2P2 DIA	PXD013453	Mario Leutert, et al.	DIA	S. cerevisiae	Fusion Lumos	UWPROFL0652_ML019_IMAC_NaCl_30_3.raw	ftp://ftp.pride.ebi.ac.uk/pride/data/archive/2019/12/PXD013453
Yeast R2P2 DIA	PXD013453	Mario Leutert, et al.	DIA	S. cerevisiae	Fusion Lumos	UWPROFL0605_ML019_IMAC_NaCl_90_1.raw	ftp://ftp.pride.ebi.ac.uk/pride/data/archive/2019/12/PXD013453
Yeast R2P2 DIA	PXD013453	Mario Leutert, et al.	DIA	S. cerevisiae	Fusion Lumos	UWPROFL0636_ML019_IMAC_NaCl_90_2.raw	ftp://ftp.pride.ebi.ac.uk/pride/data/archive/2019/12/PXD013453
Yeast R2P2 DIA	PXD013453	Mario Leutert, et al.	DIA	S. cerevisiae	Fusion Lumos	UWPROFL0653_ML019_IMAC_NaCl_90_3.raw	ftp://ftp.pride.ebi.ac.uk/pride/data/archive/2019/12/PXD013453
Yeast R2P2 DIA	PXD013453	Mario Leutert, et al.	DIA	S. cerevisiae	Fusion Lumos	UWPROFL0627_ML019_IMAC_pool_dia_gpf450to550.raw	ftp://ftp.pride.ebi.ac.uk/pride/data/archive/2019/12/PXD013453
Yeast R2P2 DIA	PXD013453	Mario Leutert, et al.	DIA	S. cerevisiae	Fusion Lumos	UWPROFL0628_ML019_IMAC_pool_dia_gpf550to650.raw	ftp://ftp.pride.ebi.ac.uk/pride/data/archive/2019/12/PXD013453
Yeast R2P2 DIA	PXD013453	Mario Leutert, et al.	DIA	S. cerevisiae	Fusion Lumos	UWPROFL0629_ML019_IMAC_pool_dia_gpf650to750.raw	ftp://ftp.pride.ebi.ac.uk/pride/data/archive/2019/12/PXD013453
Yeast R2P2 DIA	PXD013453	Mario Leutert, et al.	DIA	S. cerevisiae	Fusion Lumos	UWPROFL0630_ML019_IMAC_pool_dia_gpf750to850.raw	ftp://ftp.pride.ebi.ac.uk/pride/data/archive/2019/12/PXD013453
Yeast R2P2 DIA	PXD013453	Mario Leutert, et al.	DIA	S. cerevisiae	Fusion Lumos	UWPROFL0631_ML019_IMAC_pool_dia_gpf850to950.raw	ftp://ftp.pride.ebi.ac.uk/pride/data/archive/2019/12/PXD013453
Yeast R2P2 DIA	PXD013453	Mario Leutert, et al.	DIA	S. cerevisiae	Fusion Lumos	UWPROFL0632_ML019_IMAC_pool_dia_gpf950to1050.raw	ftp://ftp.pride.ebi.ac.uk/pride/data/archive/2019/12/PXD013453
Yeast R2P2 DIA	PXD013453	Mario Leutert, et al.	DIA	S. cerevisiae	Fusion Lumos	UWPROFL0633_ML019_IMAC_pool_dia_gpf1050to1150.raw	ftp://ftp.pride.ebi.ac.uk/pride/data/archive/2019/12/PXD013453
Yeast R2P2 DIA	PXD013453	Mario Leutert, et al.	DIA	S. cerevisiae	Fusion Lumos	UWPROFL0616_ML019_IMAC_SLAT_10_1.raw	ftp://ftp.pride.ebi.ac.uk/pride/data/archive/2019/12/PXD013453
Yeast R2P2 DIA	PXD013453	Mario Leutert, et al.	DIA	S. cerevisiae	Fusion Lumos	UWPROFL0644_ML019_IMAC_SLAT_10_2.raw	ftp://ftp.pride.ebi.ac.uk/pride/data/archive/2019/12/PXD013453
Yeast R2P2 DIA	PXD013453	Mario Leutert, et al.	DIA	S. cerevisiae	Fusion Lumos	UWPROFL0670_ML019_IMAC_SLAT_10_3.raw	ftp://ftp.pride.ebi.ac.uk/pride/data/archive/2019/12/PXD013453
Yeast R2P2 DIA	PXD013453	Mario Leutert, et al.	DIA	S. cerevisiae	Fusion Lumos	UWPROFL0617_ML019_IMAC_SLAT_30_1.raw	ftp://ftp.pride.ebi.ac.uk/pride/data/archive/2019/12/PXD013453
Yeast R2P2 DIA	PXD013453	Mario Leutert, et al.	DIA	S. cerevisiae	Fusion Lumos	UWPROFL0645_ML019_IMAC_SLAT_30_2.raw	ftp://ftp.pride.ebi.ac.uk/pride/data/archive/2019/12/PXD013453
Yeast R2P2 DIA	PXD013453	Mario Leutert, et al.	DIA	S. cerevisiae	Fusion Lumos	UWPROFL0671_ML019_IMAC_SLAT_30_3.raw	ftp://ftp.pride.ebi.ac.uk/pride/data/archive/2019/12/PXD013453
Yeast R2P2 DIA	PXD013453	Mario Leutert, et al.	DIA	S. cerevisiae	Fusion Lumos	UWPROFL0618_ML019_IMAC_SLAT_90_1.raw	ftp://ftp.pride.ebi.ac.uk/pride/data/archive/2019/12/PXD013453
Yeast R2P2 DIA	PXD013453	Mario Leutert, et al.	DIA	S. cerevisiae	Fusion Lumos	UWPROFL0646_ML019_IMAC_SLAT_90_2.raw	ftp://ftp.pride.ebi.ac.uk/pride/data/archive/2019/12/PXD013453
Yeast R2P2 DIA	PXD013453	Mario Leutert, et al.	DIA	S. cerevisiae	Fusion Lumos	UWPROFL0672_ML019_IMAC_SLAT_90_3.raw	ftp://ftp.pride.ebi.ac.uk/pride/data/archive/2019/12/PXD013453
Yeast R2P2 DIA	PXD013453	Mario Leutert, et al.	DIA	S. cerevisiae	Fusion Lumos	UWPROFL0597_ML019_IMAC_unt_10_1.raw	ftp://ftp.pride.ebi.ac.uk/pride/data/archive/2019/12/PXD013453
Yeast R2P2 DIA	PXD013453	Mario Leutert, et al.	DIA	S. cerevisiae	Fusion Lumos	UWPROFL0638_ML019_IMAC_unt_10_2.raw	ftp://ftp.pride.ebi.ac.uk/pride/data/archive/2019/12/PXD013453
Yeast R2P2 DIA	PXD013453	Mario Leutert, et al.	DIA	S. cerevisiae	Fusion Lumos	UWPROFL0667_ML019_IMAC_unt_10_3.raw	ftp://ftp.pride.ebi.ac.uk/pride/data/archive/2019/12/PXD013453
Yeast R2P2 DIA	PXD013453	Mario Leutert, et al.	DIA	S. cerevisiae	Fusion Lumos	UWPROFL0598_ML019_IMAC_unt_30_1.raw	ftp://ftp.pride.ebi.ac.uk/pride/data/archive/2019/12/PXD013453
Yeast R2P2 DIA	PXD013453	Mario Leutert, et al.	DIA	S. cerevisiae	Fusion Lumos	UWPROFL0639_ML019_IMAC_unt_30_2.raw	ftp://ftp.pride.ebi.ac.uk/pride/data/archive/2019/12/PXD013453
Yeast R2P2 DIA	PXD013453	Mario Leutert, et al.	DIA	S. cerevisiae	Fusion Lumos	UWPROFL0668_ML019_IMAC_unt_30_3.raw	ftp://ftp.pride.ebi.ac.uk/pride/data/archive/2019/12/PXD013453
Yeast R2P2 DIA	PXD013453	Mario Leutert, et al.	DIA	S. cerevisiae	Fusion Lumos	UWPROFL0599_ML019_IMAC_unt_90_1.raw	ftp://ftp.pride.ebi.ac.uk/pride/data/archive/2019/12/PXD013453
Yeast R2P2 DIA	PXD013453	Mario Leutert, et al.	DIA	S. cerevisiae	Fusion Lumos	UWPROFL0640_ML019_IMAC_unt_90_2.raw	ftp://ftp.pride.ebi.ac.uk/pride/data/archive/2019/12/PXD013453
Yeast R2P2 DIA	PXD013453	Mario Leutert, et al.	DIA	S. cerevisiae	Fusion Lumos	UWPROFL0669_ML019_IMAC_unt_90_3.raw	ftp://ftp.pride.ebi.ac.uk/pride/data/archive/2019/12/PXD013453
U2OS DIA	PXD017476	Shisheng Wang, et al.	DIA	U2OS	Fusion Lumos	yanliu_20180406_Phos_Cyc_1.raw	ftp://ftp.pride.ebi.ac.uk/pride/data/archive/2020/06/PXD017476
U2OS DIA	PXD017476	Shisheng Wang, et al.	DIA	U2OS	Fusion Lumos	yanliu_20180406_Phos_Cyc_2.raw	ftp://ftp.pride.ebi.ac.uk/pride/data/archive/2020/06/PXD017476
U2OS DIA	PXD017476	Shisheng Wang, et al.	DIA	U2OS	Fusion Lumos	yanliu_20180406_Phos_Cyc_3.raw	ftp://ftp.pride.ebi.ac.uk/pride/data/archive/2020/06/PXD017476
U2OS DIA	PXD017476	Shisheng Wang, et al.	DIA	U2OS	Fusion Lumos	yanliu_20180406_Phos_Cyc_4.raw	ftp://ftp.pride.ebi.ac.uk/pride/data/archive/2020/06/PXD017476
U2OS DIA	PXD017476	Shisheng Wang, et al.	DIA	U2OS	Fusion Lumos	yanliu_20180406_Phos_Cyc_5.raw	ftp://ftp.pride.ebi.ac.uk/pride/data/archive/2020/06/PXD017476
U2OS DIA	PXD017476	Shisheng Wang, et al.	DIA	U2OS	Fusion Lumos	yanliu_20180406_Phos_Cyc_6.raw	ftp://ftp.pride.ebi.ac.uk/pride/data/archive/2020/06/PXD017476
U2OS DIA	PXD017476	Shisheng Wang, et al.	DIA	U2OS	Fusion Lumos	yanliu_20180406_Phos_Cyc_7.raw	ftp://ftp.pride.ebi.ac.uk/pride/data/archive/2020/06/PXD017476
U2OS DIA	PXD017476	Shisheng Wang, et al.	DIA	U2OS	Fusion Lumos	yanliu_20180406_Phos_Cyc_8.raw	ftp://ftp.pride.ebi.ac.uk/pride/data/archive/2020/06/PXD017476
U2OS DIA	PXD017476	Shisheng Wang, et al.	DIA	U2OS	Fusion Lumos	yanliu_20180406_Phos_Cyc_9.raw	ftp://ftp.pride.ebi.ac.uk/pride/data/archive/2020/06/PXD017476
U2OS DIA	PXD017476	Shisheng Wang, et al.	DIA	U2OS	Fusion Lumos	yanliu_20180406_Phos_Cyc_10.raw	ftp://ftp.pride.ebi.ac.uk/pride/data/archive/2020/06/PXD017476
U2OS DIA	PXD017476	Shisheng Wang, et al.	DIA	U2OS	Fusion Lumos	yanliu_20180406_Phos_Noco_1.raw	ftp://ftp.pride.ebi.ac.uk/pride/data/archive/2020/06/PXD017476
U2OS DIA	PXD017476	Shisheng Wang, et al.	DIA	U2OS	Fusion Lumos	yanliu_20180406_Phos_Noco_2.raw	ftp://ftp.pride.ebi.ac.uk/pride/data/archive/2020/06/PXD017476
U2OS DIA	PXD017476	Shisheng Wang, et al.	DIA	U2OS	Fusion Lumos	yanliu_20180406_Phos_Noco_3.raw	ftp://ftp.pride.ebi.ac.uk/pride/data/archive/2020/06/PXD017476
U2OS DIA	PXD017476	Shisheng Wang, et al.	DIA	U2OS	Fusion Lumos	yanliu_20180406_Phos_Noco_4.raw	ftp://ftp.pride.ebi.ac.uk/pride/data/archive/2020/06/PXD017476
U2OS DIA	PXD017476	Shisheng Wang, et al.	DIA	U2OS	Fusion Lumos	yanliu_20180406_Phos_Noco_5.raw	ftp://ftp.pride.ebi.ac.uk/pride/data/archive/2020/06/PXD017476
U2OS DIA	PXD017476	Shisheng Wang, et al.	DIA	U2OS	Fusion Lumos	yanliu_20180406_Phos_Noco_6.raw	ftp://ftp.pride.ebi.ac.uk/pride/data/archive/2020/06/PXD017476
U2OS DIA	PXD017476	Shisheng Wang, et al.	DIA	U2OS	Fusion Lumos	yanliu_20180406_Phos_Noco_7.raw	ftp://ftp.pride.ebi.ac.uk/pride/data/archive/2020/06/PXD017476
U2OS DIA	PXD017476	Shisheng Wang, et al.	DIA	U2OS	Fusion Lumos	yanliu_20180406_Phos_Noco_8.raw	ftp://ftp.pride.ebi.ac.uk/pride/data/archive/2020/06/PXD017476
U2OS DIA	PXD017476	Shisheng Wang, et al.	DIA	U2OS	Fusion Lumos	yanliu_20180406_Phos_Noco_9.raw	ftp://ftp.pride.ebi.ac.uk/pride/data/archive/2020/06/PXD017476
U2OS DIA	PXD017476	Shisheng Wang, et al.	DIA	U2OS	Fusion Lumos	yanliu_20180406_Phos_Noco_10.raw	ftp://ftp.pride.ebi.ac.uk/pride/data/archive/2020/06/PXD017476
U2OS DDA	PXD017476	Shisheng Wang, et al.	DDA	U2OS	Fusion Lumos	yanliu_20180411_Phos_Cyc_DDA_1.raw	ftp://ftp.pride.ebi.ac.uk/pride/data/archive/2020/06/PXD017476
U2OS DDA	PXD017476	Shisheng Wang, et al.	DDA	U2OS	Fusion Lumos	yanliu_20180411_Phos_Cyc_DDA_2.raw	ftp://ftp.pride.ebi.ac.uk/pride/data/archive/2020/06/PXD017476
U2OS DDA	PXD017476	Shisheng Wang, et al.	DDA	U2OS	Fusion Lumos	yanliu_20180411_Phos_Cyc_DDA_3.raw	ftp://ftp.pride.ebi.ac.uk/pride/data/archive/2020/06/PXD017476
U2OS DDA	PXD017476	Shisheng Wang, et al.	DDA	U2OS	Fusion Lumos	yanliu_20180411_Phos_Cyc_DDA_4.raw	ftp://ftp.pride.ebi.ac.uk/pride/data/archive/2020/06/PXD017476
U2OS DDA	PXD017476	Shisheng Wang, et al.	DDA	U2OS	Fusion Lumos	yanliu_20180411_Phos_Cyc_DDA_5.raw	ftp://ftp.pride.ebi.ac.uk/pride/data/archive/2020/06/PXD017476
U2OS DDA	PXD017476	Shisheng Wang, et al.	DDA	U2OS	Fusion Lumos	yanliu_20180411_Phos_Cyc_DDA_6.raw	ftp://ftp.pride.ebi.ac.uk/pride/data/archive/2020/06/PXD017476
U2OS DDA	PXD017476	Shisheng Wang, et al.	DDA	U2OS	Fusion Lumos	yanliu_20180411_Phos_Cyc_DDA_7.raw	ftp://ftp.pride.ebi.ac.uk/pride/data/archive/2020/06/PXD017476
U2OS DDA	PXD017476	Shisheng Wang, et al.	DDA	U2OS	Fusion Lumos	yanliu_20180411_Phos_Cyc_DDA_8.raw	ftp://ftp.pride.ebi.ac.uk/pride/data/archive/2020/06/PXD017476
U2OS DDA	PXD017476	Shisheng Wang, et al.	DDA	U2OS	Fusion Lumos	yanliu_20180411_Phos_Cyc_DDA_9.raw	ftp://ftp.pride.ebi.ac.uk/pride/data/archive/2020/06/PXD017476
U2OS DDA	PXD017476	Shisheng Wang, et al.	DDA	U2OS	Fusion Lumos	yanliu_20180411_Phos_Cyc_DDA_10.raw	ftp://ftp.pride.ebi.ac.uk/pride/data/archive/2020/06/PXD017476
U2OS DDA	PXD017476	Shisheng Wang, et al.	DDA	U2OS	Fusion Lumos	yanliu_20180411_Phos_Noco_DDA_1.raw	ftp://ftp.pride.ebi.ac.uk/pride/data/archive/2020/06/PXD017476
U2OS DDA	PXD017476	Shisheng Wang, et al.	DDA	U2OS	Fusion Lumos	yanliu_20180411_Phos_Noco_DDA_2.raw	ftp://ftp.pride.ebi.ac.uk/pride/data/archive/2020/06/PXD017476
U2OS DDA	PXD017476	Shisheng Wang, et al.	DDA	U2OS	Fusion Lumos	yanliu_20180411_Phos_Noco_DDA_3.raw	ftp://ftp.pride.ebi.ac.uk/pride/data/archive/2020/06/PXD017476
U2OS DDA	PXD017476	Shisheng Wang, et al.	DDA	U2OS	Fusion Lumos	yanliu_20180411_Phos_Noco_DDA_4.raw	ftp://ftp.pride.ebi.ac.uk/pride/data/archive/2020/06/PXD017476
U2OS DDA	PXD017476	Shisheng Wang, et al.	DDA	U2OS	Fusion Lumos	yanliu_20180411_Phos_Noco_DDA_5.raw	ftp://ftp.pride.ebi.ac.uk/pride/data/archive/2020/06/PXD017476
U2OS DDA	PXD017476	Shisheng Wang, et al.	DDA	U2OS	Fusion Lumos	yanliu_20180411_Phos_Noco_DDA_6.raw	ftp://ftp.pride.ebi.ac.uk/pride/data/archive/2020/06/PXD017476
U2OS DDA	PXD017476	Shisheng Wang, et al.	DDA	U2OS	Fusion Lumos	yanliu_20180411_Phos_Noco_DDA_7.raw	ftp://ftp.pride.ebi.ac.uk/pride/data/archive/2020/06/PXD017476
U2OS DDA	PXD017476	Shisheng Wang, et al.	DDA	U2OS	Fusion Lumos	yanliu_20180411_Phos_Noco_DDA_8.raw	ftp://ftp.pride.ebi.ac.uk/pride/data/archive/2020/06/PXD017476
U2OS DDA	PXD017476	Shisheng Wang, et al.	DDA	U2OS	Fusion Lumos	yanliu_20180411_Phos_Noco_DDA_9.raw	ftp://ftp.pride.ebi.ac.uk/pride/data/archive/2020/06/PXD017476
U2OS DDA	PXD017476	Shisheng Wang, et al.	DDA	U2OS	Fusion Lumos	yanliu_20180411_Phos_Noco_DDA_10.raw	ftp://ftp.pride.ebi.ac.uk/pride/data/archive/2020/06/PXD017476
RPE1 DIA	PXD014525	Dorte B. Bekker-Jensen, et al.	DIA	RPE1	QE HF-X	20171125_QE7_nLC14_DBJ_SA_DIAphos_RPE1_pilot2_Cobimetinib_0-5uM_01.raw	ftp://ftp.pride.ebi.ac.uk/pride/data/archive/2020/05/PXD014525
RPE1 DIA	PXD014525	Dorte B. Bekker-Jensen, et al.	DIA	RPE1	QE HF-X	20171125_QE7_nLC14_DBJ_SA_DIAphos_RPE1_pilot2_Cobimetinib_0-5uM_02.raw	ftp://ftp.pride.ebi.ac.uk/pride/data/archive/2020/05/PXD014525
RPE1 DIA	PXD014525	Dorte B. Bekker-Jensen, et al.	DIA	RPE1	QE HF-X	20171125_QE7_nLC14_DBJ_SA_DIAphos_RPE1_pilot2_Cobimetinib_0-5uM_03.raw	ftp://ftp.pride.ebi.ac.uk/pride/data/archive/2020/05/PXD014525
RPE1 DIA	PXD014525	Dorte B. Bekker-Jensen, et al.	DIA	RPE1	QE HF-X	20171125_QE7_nLC14_DBJ_SA_DIAphos_RPE1_pilot2_Cobimetinib_5uM_01.raw	ftp://ftp.pride.ebi.ac.uk/pride/data/archive/2020/05/PXD014525
RPE1 DIA	PXD014525	Dorte B. Bekker-Jensen, et al.	DIA	RPE1	QE HF-X	20171125_QE7_nLC14_DBJ_SA_DIAphos_RPE1_pilot2_Cobimetinib_5uM_02.raw	ftp://ftp.pride.ebi.ac.uk/pride/data/archive/2020/05/PXD014525
RPE1 DIA	PXD014525	Dorte B. Bekker-Jensen, et al.	DIA	RPE1	QE HF-X	20171125_QE7_nLC14_DBJ_SA_DIAphos_RPE1_pilot2_Cobimetinib_5uM_03.raw	ftp://ftp.pride.ebi.ac.uk/pride/data/archive/2020/05/PXD014525
RPE1 DIA	PXD014525	Dorte B. Bekker-Jensen, et al.	DIA	RPE1	QE HF-X	20171125_QE7_nLC14_DBJ_SA_DIAphos_RPE1_pilot2_EGF_01.raw	ftp://ftp.pride.ebi.ac.uk/pride/data/archive/2020/05/PXD014525
RPE1 DIA	PXD014525	Dorte B. Bekker-Jensen, et al.	DIA	RPE1	QE HF-X	20171125_QE7_nLC14_DBJ_SA_DIAphos_RPE1_pilot2_EGF_02.raw	ftp://ftp.pride.ebi.ac.uk/pride/data/archive/2020/05/PXD014525
RPE1 DIA	PXD014525	Dorte B. Bekker-Jensen, et al.	DIA	RPE1	QE HF-X	20171125_QE7_nLC14_DBJ_SA_DIAphos_RPE1_pilot2_EGF_03.raw	ftp://ftp.pride.ebi.ac.uk/pride/data/archive/2020/05/PXD014525
RPE1 DIA	PXD014525	Dorte B. Bekker-Jensen, et al.	DIA	RPE1	QE HF-X	20171125_QE7_nLC14_DBJ_SA_DIAphos_RPE1_pilot2_NoSerum_01.raw	ftp://ftp.pride.ebi.ac.uk/pride/data/archive/2020/05/PXD014525
RPE1 DIA	PXD014525	Dorte B. Bekker-Jensen, et al.	DIA	RPE1	QE HF-X	20171125_QE7_nLC14_DBJ_SA_DIAphos_RPE1_pilot2_NoSerum_02.raw	ftp://ftp.pride.ebi.ac.uk/pride/data/archive/2020/05/PXD014525
RPE1 DIA	PXD014525	Dorte B. Bekker-Jensen, et al.	DIA	RPE1	QE HF-X	20171125_QE7_nLC14_DBJ_SA_DIAphos_RPE1_pilot2_NoSerum_03.raw	ftp://ftp.pride.ebi.ac.uk/pride/data/archive/2020/05/PXD014525
RPE1 DIA	PXD014525	Dorte B. Bekker-Jensen, et al.	DIA	RPE1	QE HF-X	20171125_QE7_nLC14_DBJ_SA_DIAphos_RPE1_pilot2_PD0325901_0-5uM_01.raw	ftp://ftp.pride.ebi.ac.uk/pride/data/archive/2020/05/PXD014525
RPE1 DIA	PXD014525	Dorte B. Bekker-Jensen, et al.	DIA	RPE1	QE HF-X	20171125_QE7_nLC14_DBJ_SA_DIAphos_RPE1_pilot2_PD0325901_0-5uM_02.raw	ftp://ftp.pride.ebi.ac.uk/pride/data/archive/2020/05/PXD014525
RPE1 DIA	PXD014525	Dorte B. Bekker-Jensen, et al.	DIA	RPE1	QE HF-X	20171125_QE7_nLC14_DBJ_SA_DIAphos_RPE1_pilot2_PD0325901_0-5uM_03.raw	ftp://ftp.pride.ebi.ac.uk/pride/data/archive/2020/05/PXD014525
RPE1 DIA	PXD014525	Dorte B. Bekker-Jensen, et al.	DIA	RPE1	QE HF-X	20171125_QE7_nLC14_DBJ_SA_DIAphos_RPE1_pilot2_PD0325901_5uM_01.raw	ftp://ftp.pride.ebi.ac.uk/pride/data/archive/2020/05/PXD014525
RPE1 DIA	PXD014525	Dorte B. Bekker-Jensen, et al.	DIA	RPE1	QE HF-X	20171125_QE7_nLC14_DBJ_SA_DIAphos_RPE1_pilot2_PD0325901_5uM_02.raw	ftp://ftp.pride.ebi.ac.uk/pride/data/archive/2020/05/PXD014525
RPE1 DIA	PXD014525	Dorte B. Bekker-Jensen, et al.	DIA	RPE1	QE HF-X	20171125_QE7_nLC14_DBJ_SA_DIAphos_RPE1_pilot2_PD0325901_5uM_03.raw	ftp://ftp.pride.ebi.ac.uk/pride/data/archive/2020/05/PXD014525
Two-proteome DIA	PXD014525	Dorte B. Bekker-Jensen, et al.	DIA	Yeast+HeLa	QE HF-X	20180815_QE3_nLC3_AH_DIA_Honly_ind_01.raw	ftp://ftp.pride.ebi.ac.uk/pride/data/archive/2020/05/PXD014525
Two-proteome DIA	PXD014525	Dorte B. Bekker-Jensen, et al.	DIA	Yeast+HeLa	QE HF-X	20180815_QE3_nLC3_AH_DIA_Honly_ind_02.raw	ftp://ftp.pride.ebi.ac.uk/pride/data/archive/2020/05/PXD014525
Two-proteome DIA	PXD014525	Dorte B. Bekker-Jensen, et al.	DIA	Yeast+HeLa	QE HF-X	20180815_QE3_nLC3_AH_DIA_Honly_ind_03.raw	ftp://ftp.pride.ebi.ac.uk/pride/data/archive/2020/05/PXD014525
Two-proteome DIA	PXD014525	Dorte B. Bekker-Jensen, et al.	DIA	Yeast+HeLa	QE HF-X	20180815_QE3_nLC3_AH_DIA_Yonly_ind_01.raw	ftp://ftp.pride.ebi.ac.uk/pride/data/archive/2020/05/PXD014525
Two-proteome DIA	PXD014525	Dorte B. Bekker-Jensen, et al.	DIA	Yeast+HeLa	QE HF-X	20180815_QE3_nLC3_AH_DIA_Yonly_ind_02.raw	ftp://ftp.pride.ebi.ac.uk/pride/data/archive/2020/05/PXD014525
Two-proteome DIA	PXD014525	Dorte B. Bekker-Jensen, et al.	DIA	Yeast+HeLa	QE HF-X	20180815_QE3_nLC3_AH_DIA_Yonly_ind_03.raw	ftp://ftp.pride.ebi.ac.uk/pride/data/archive/2020/05/PXD014525
Two-proteome DIA	PXD014525	Dorte B. Bekker-Jensen, et al.	DIA	Yeast+HeLa	QE HF-X	20180816_QE3_nLC3_AH_DIA_H100_Y100_01.raw	ftp://ftp.pride.ebi.ac.uk/pride/data/archive/2020/05/PXD014525
Two-proteome DIA	PXD014525	Dorte B. Bekker-Jensen, et al.	DIA	Yeast+HeLa	QE HF-X	20180816_QE3_nLC3_AH_DIA_H100_Y100_02.raw	ftp://ftp.pride.ebi.ac.uk/pride/data/archive/2020/05/PXD014525
Two-proteome DIA	PXD014525	Dorte B. Bekker-Jensen, et al.	DIA	Yeast+HeLa	QE HF-X	20180816_QE3_nLC3_AH_DIA_H100_Y100_03.raw	ftp://ftp.pride.ebi.ac.uk/pride/data/archive/2020/05/PXD014525
Two-proteome DIA	PXD014525	Dorte B. Bekker-Jensen, et al.	DIA	Yeast+HeLa	QE HF-X	20180816_QE3_nLC3_AH_DIA_H100_Y100_04.raw	ftp://ftp.pride.ebi.ac.uk/pride/data/archive/2020/05/PXD014525
Two-proteome DIA	PXD014525	Dorte B. Bekker-Jensen, et al.	DIA	Yeast+HeLa	QE HF-X	20180816_QE3_nLC3_AH_DIA_H100_Y100_05.raw	ftp://ftp.pride.ebi.ac.uk/pride/data/archive/2020/05/PXD014525
Two-proteome DIA	PXD014525	Dorte B. Bekker-Jensen, et al.	DIA	Yeast+HeLa	QE HF-X	20180816_QE3_nLC3_AH_DIA_H100_Y100_06.raw	ftp://ftp.pride.ebi.ac.uk/pride/data/archive/2020/05/PXD014525
Two-proteome DIA	PXD014525	Dorte B. Bekker-Jensen, et al.	DIA	Yeast+HeLa	QE HF-X	20180816_QE3_nLC3_AH_DIA_H100_Y150_01.raw	ftp://ftp.pride.ebi.ac.uk/pride/data/archive/2020/05/PXD014525
Two-proteome DIA	PXD014525	Dorte B. Bekker-Jensen, et al.	DIA	Yeast+HeLa	QE HF-X	20180816_QE3_nLC3_AH_DIA_H100_Y150_02.raw	ftp://ftp.pride.ebi.ac.uk/pride/data/archive/2020/05/PXD014525
Two-proteome DIA	PXD014525	Dorte B. Bekker-Jensen, et al.	DIA	Yeast+HeLa	QE HF-X	20180816_QE3_nLC3_AH_DIA_H100_Y150_03.raw	ftp://ftp.pride.ebi.ac.uk/pride/data/archive/2020/05/PXD014525
Two-proteome DIA	PXD014525	Dorte B. Bekker-Jensen, et al.	DIA	Yeast+HeLa	QE HF-X	20180816_QE3_nLC3_AH_DIA_H100_Y150_04.raw	ftp://ftp.pride.ebi.ac.uk/pride/data/archive/2020/05/PXD014525
Two-proteome DIA	PXD014525	Dorte B. Bekker-Jensen, et al.	DIA	Yeast+HeLa	QE HF-X	20180816_QE3_nLC3_AH_DIA_H100_Y150_05.raw	ftp://ftp.pride.ebi.ac.uk/pride/data/archive/2020/05/PXD014525
Two-proteome DIA	PXD014525	Dorte B. Bekker-Jensen, et al.	DIA	Yeast+HeLa	QE HF-X	20180816_QE3_nLC3_AH_DIA_H100_Y150_06.raw	ftp://ftp.pride.ebi.ac.uk/pride/data/archive/2020/05/PXD014525
Two-proteome DIA	PXD014525	Dorte B. Bekker-Jensen, et al.	DIA	Yeast+HeLa	QE HF-X	20180816_QE3_nLC3_AH_DIA_H100_Y200_01.raw	ftp://ftp.pride.ebi.ac.uk/pride/data/archive/2020/05/PXD014525
Two-proteome DIA	PXD014525	Dorte B. Bekker-Jensen, et al.	DIA	Yeast+HeLa	QE HF-X	20180816_QE3_nLC3_AH_DIA_H100_Y200_02.raw	ftp://ftp.pride.ebi.ac.uk/pride/data/archive/2020/05/PXD014525
Two-proteome DIA	PXD014525	Dorte B. Bekker-Jensen, et al.	DIA	Yeast+HeLa	QE HF-X	20180816_QE3_nLC3_AH_DIA_H100_Y200_03.raw	ftp://ftp.pride.ebi.ac.uk/pride/data/archive/2020/05/PXD014525
Two-proteome DIA	PXD014525	Dorte B. Bekker-Jensen, et al.	DIA	Yeast+HeLa	QE HF-X	20180816_QE3_nLC3_AH_DIA_H100_Y200_04.raw	ftp://ftp.pride.ebi.ac.uk/pride/data/archive/2020/05/PXD014525
Two-proteome DIA	PXD014525	Dorte B. Bekker-Jensen, et al.	DIA	Yeast+HeLa	QE HF-X	20180816_QE3_nLC3_AH_DIA_H100_Y200_05.raw	ftp://ftp.pride.ebi.ac.uk/pride/data/archive/2020/05/PXD014525
Two-proteome DIA	PXD014525	Dorte B. Bekker-Jensen, et al.	DIA	Yeast+HeLa	QE HF-X	20180816_QE3_nLC3_AH_DIA_H100_Y200_06.raw	ftp://ftp.pride.ebi.ac.uk/pride/data/archive/2020/05/PXD014525
Two-proteome DIA	PXD014525	Dorte B. Bekker-Jensen, et al.	DIA	Yeast+HeLa	QE HF-X	20180816_QE3_nLC3_AH_DIA_H100_Y25_01.raw	ftp://ftp.pride.ebi.ac.uk/pride/data/archive/2020/05/PXD014525
Two-proteome DIA	PXD014525	Dorte B. Bekker-Jensen, et al.	DIA	Yeast+HeLa	QE HF-X	20180816_QE3_nLC3_AH_DIA_H100_Y25_02.raw	ftp://ftp.pride.ebi.ac.uk/pride/data/archive/2020/05/PXD014525
Two-proteome DIA	PXD014525	Dorte B. Bekker-Jensen, et al.	DIA	Yeast+HeLa	QE HF-X	20180816_QE3_nLC3_AH_DIA_H100_Y25_03.raw	ftp://ftp.pride.ebi.ac.uk/pride/data/archive/2020/05/PXD014525
Two-proteome DIA	PXD014525	Dorte B. Bekker-Jensen, et al.	DIA	Yeast+HeLa	QE HF-X	20180816_QE3_nLC3_AH_DIA_H100_Y25_04.raw	ftp://ftp.pride.ebi.ac.uk/pride/data/archive/2020/05/PXD014525
Two-proteome DIA	PXD014525	Dorte B. Bekker-Jensen, et al.	DIA	Yeast+HeLa	QE HF-X	20180816_QE3_nLC3_AH_DIA_H100_Y25_05.raw	ftp://ftp.pride.ebi.ac.uk/pride/data/archive/2020/05/PXD014525
Two-proteome DIA	PXD014525	Dorte B. Bekker-Jensen, et al.	DIA	Yeast+HeLa	QE HF-X	20180816_QE3_nLC3_AH_DIA_H100_Y25_06.raw	ftp://ftp.pride.ebi.ac.uk/pride/data/archive/2020/05/PXD014525
Two-proteome DIA	PXD014525	Dorte B. Bekker-Jensen, et al.	DIA	Yeast+HeLa	QE HF-X	20180816_QE3_nLC3_AH_DIA_H100_Y50_01.raw	ftp://ftp.pride.ebi.ac.uk/pride/data/archive/2020/05/PXD014525
Two-proteome DIA	PXD014525	Dorte B. Bekker-Jensen, et al.	DIA	Yeast+HeLa	QE HF-X	20180816_QE3_nLC3_AH_DIA_H100_Y50_02.raw	ftp://ftp.pride.ebi.ac.uk/pride/data/archive/2020/05/PXD014525
Two-proteome DIA	PXD014525	Dorte B. Bekker-Jensen, et al.	DIA	Yeast+HeLa	QE HF-X	20180816_QE3_nLC3_AH_DIA_H100_Y50_03.raw	ftp://ftp.pride.ebi.ac.uk/pride/data/archive/2020/05/PXD014525
Two-proteome DIA	PXD014525	Dorte B. Bekker-Jensen, et al.	DIA	Yeast+HeLa	QE HF-X	20180816_QE3_nLC3_AH_DIA_H100_Y50_04.raw	ftp://ftp.pride.ebi.ac.uk/pride/data/archive/2020/05/PXD014525
Two-proteome DIA	PXD014525	Dorte B. Bekker-Jensen, et al.	DIA	Yeast+HeLa	QE HF-X	20180816_QE3_nLC3_AH_DIA_H100_Y50_05.raw	ftp://ftp.pride.ebi.ac.uk/pride/data/archive/2020/05/PXD014525
Two-proteome DIA	PXD014525	Dorte B. Bekker-Jensen, et al.	DIA	Yeast+HeLa	QE HF-X	20180816_QE3_nLC3_AH_DIA_H100_Y50_06.raw	ftp://ftp.pride.ebi.ac.uk/pride/data/archive/2020/05/PXD014525
